# Supplementary material
Source: PubMed Central journal article supplement (PMC5761345)

# Appendix 1: Relationships between hazard rates for cancer incidence and subsequent death, with induced hazard rates for death following cancer occurrence

September 15, 2016

Denote by  $T_1$  the time from enrollment to cancer occurrence (i.e., diagnosis of invasive breast cancer or colorectal cancer) and by  $T_2$  the time from diagnosis to death (i.e., disease-specific death or death from any cause) among cancer patients. Let  $z = (z_1, \dots, z_p)$ , for  $p \geq 1$ , denote a vector of coded baseline participant characteristics. For example,  $z$  may include indicator variables for (all but one) body mass index (BMI) categories, along with variables that have potential to confound the relationship between BMI and the outcomes under study.

A Cox model hazard rate for  $T_1$  and time  $t_1$  following enrollment for a participant with baseline characteristics  $z$  can be written

$$\lambda_1(t_1; z) = \lambda_{10}(t_1) \exp\{z_1(t_1)\beta_1\}$$

where the modeled regression variable  $z_1(t_1) = \{z_{11}(t_1), z_{12}(t_1), \dots\}$  includes  $z$ , possibly along with product terms between elements of  $z$  and (data-analyst specified) functions of  $t_1$ , thereby allowing the hazard ratio for  $z$  to vary with  $t_1$ .

Similarly a Cox model hazard rate model for  $T_2$  at time  $t_2$  following cancer occurrence for a patient having cancer diagnosis at  $T_1 = t_1$  can be written

$$\lambda_2(t_2; z, t_1) = \lambda_{20}(t_2) \exp\{z_2(t_1, t_2)\beta_2\}$$

where the modeled regression variable  $z_2(t_1, t_2) = \{z_{21}(t_1, t_2), z_{22}(t_1, t_2), \dots\}$  could, for example, include  $z$ , indicator variables for categories of  $t_1$ , and product terms between elements of  $z$  and functions of  $(t_1, t_2)$ .

These models fully specify the hazard rate function for the composite outcome  $T_3 = T_1 + T_2$  given  $z$ , which represents time from enrollment to death (i.e., disease-specific or death from any cause), for individuals with baseline characteristics  $z$ . This induced hazard rate function is rather complex, however, but can be written at time

$T_3 = t_3$  as

$$\begin{aligned} \lambda_3(t_3; z) = & \int_0^{t_3} \lambda_{10}(t_1) e^{z_1(t_1)\beta_1} \exp \left\{ - \int_0^{t_1} \lambda_{10}(s_1) e^{z_1(s_1)\beta_1} ds_1 \right\} \\ & \lambda_{20}(t_3 - t_1) e^{z_2(t_1, t_3 - t_1)\beta_2} \exp \left\{ \int_0^{t_3 - t_1} \lambda_{20}(s_2) e^{z_2(t_1, s_2)\beta_2} ds_2 \right\} dt_1 \\ & \left[ \int_0^{t_3} \lambda_{10}(t_1) e^{z_1(t_1)\beta_1} \exp \left\{ - \int_0^{t_1} \lambda_{10}(s_1) e^{z_1(s_1)\beta_1} ds_1 \right\} \right. \\ & \left. \exp \left\{ \int_0^{t_3 - t_1} \lambda_{20}(s_2) e^{z_2(t_1, s_2)\beta_2} ds_2 \right\} dt_1 + \exp \left\{ - \int_0^{t_3} \lambda_{10}(s_1) e^{z_1(s_1)\beta_1} ds_1 \right\} \right]^{-1}. \end{aligned}$$

It is evident from this expression that proportional hazards models for  $T_1$  and  $T_2$ , is, for example, the special case given by  $z_1(t_1) = z$  and  $z_2(t_1, t_2) = z$ , generally do not imply a proportional hazards model for  $T_3$ . However, there are some useful special cases connecting regression models for  $T_1$  and  $T_2$  with that for  $T_3$ .

Specifically, we see that if  $\beta_1 = 0$  and  $\beta_2 = 0$  then  $\lambda_3(t_3, z) = \lambda_3(t_3)$  for all  $t_3 > 0$ , independent of  $z$ , so that null hypothesis for  $T_1$  and  $T_2$  imply a null hypothesis for  $T_3$ , in regard to association with the baseline regression vector  $z$ . Secondly if  $T_1$  is rare, so that  $\lambda_1(t_1; z)$  is close to zero for  $t_1$  in the study follow-up period, for all  $z$ , and therefore  $\exp\{-\int_0^{t_1} \lambda_1(s_1; z) ds_1\}$  is close to one for all  $(t_1; z)$ ; and  $\beta_2 = 0$ , so that the death rate for patients having the cancer under study doesn't depend on  $(t_1, z)$ , then the hazard rate  $\lambda_3(t_3; z)$  is approximately of proportional hazards form with regression coefficient  $\beta_1$ . This scenario applies approximately to the analyses of the paper. As a third special case suppose that both  $T_1$  and  $T_2$  are rare ( $\lambda_{10}$  and  $\lambda_{20}$  close to zero). One can then note from the above expression that  $\lambda_3(t_3; z)$  is of approximate proportional hazards form with regression coefficient  $\beta_3 = \beta_1 + \beta_2$ , assuming  $z_1(t_1) \equiv z$  and  $z_2(t_1, t_2) \equiv z$ . This scenario may also apply approximately to the analyses of this paper, though the disease-specific and all cause death rates among cancer patients are not so small during the follow-up of WHI cohorts.

There are a number of variants of the above models that may be useful in some applications. For example, dependencies of hazard rates on potential confounding variables may be modeled by stratifying baseline functions  $\lambda_{10}$  and  $\lambda_{20}$ , rather than by regression modeling, as is also the case for the dependence of  $\lambda_2$  and  $t_1$ . Also, another class of models would model the baseline hazard rate among cancer patients as a function of time since study enrollment, rather than time since cancer diagnosis, thereby giving a somewhat different interpretation to  $\beta_2$ , and to the induced hazard rate model for  $T_3$ . There is a considerable statistical literature on modeling choices for multivariate failure time variables of these types, and on related parameter estimation procedures (e.g., Prentice, Williams and Peterson, 1981; Andersen et al., 1993; Kalbfleisch and Prentice, 2002; Cook and Lawless, 2007).

#### Appendix References

Andersen PK, Borgan Ø, Gill RD, Keiding N. (1983). Statistical Models based on Counting Processes. New York: Springer Verlag.

Cook, RJ and Lawless JF. (2007). *The Statistical Analysis of Recurrent Events*. Springer.

Kalbfleisch JD and Prentice RL. *The Statistical Analysis of Failure Time Data*, Second Edition. New York: Wiley.

Prentice RL, Williams B, Peterson AV. (1981). On the regression analysis of multivariate failure time data. *Biometrika* 68, 373–379.

**eTable 1. Baseline Characteristics of Breast Cancer Survivor Cohort by baseline BMI group (n=7633)**

|                                                                   | Normal   |      | Overweight |      | Grade-1 Obesity |      | Grade-2+3 Obesity |      | P <sup>1</sup> |
|-------------------------------------------------------------------|----------|------|------------|------|-----------------|------|-------------------|------|----------------|
|                                                                   | < 25     |      | 25 - < 30  |      | 30 - < 35       |      | ≥ 35              |      |                |
|                                                                   | (n=2517) |      | (n=2658)   |      | (n=1526)        |      | (n=932)           |      |                |
|                                                                   | N        | %    | N          | %    | N               | %    | N                 | %    |                |
| Age at screening                                                  |          |      |            |      |                 |      |                   |      | <0.001         |
| 50-59                                                             | 837      | 33.3 | 796        | 29.9 | 446             | 29.2 | 319               | 34.2 |                |
| 60-69                                                             | 1110     | 44.1 | 1261       | 47.4 | 756             | 49.5 | 470               | 50.4 |                |
| 70-79                                                             | 570      | 22.6 | 601        | 22.6 | 324             | 21.2 | 143               | 15.3 |                |
| Race/ethnicity                                                    |          |      |            |      |                 |      |                   |      | <0.001         |
| White                                                             | 2299     | 91.3 | 2340       | 88.0 | 1299            | 85.1 | 741               | 79.5 |                |
| Black                                                             | 86       | 3.4  | 156        | 5.9  | 141             | 9.2  | 136               | 14.6 |                |
| Hispanic                                                          | 34       | 1.4  | 68         | 2.6  | 40              | 2.6  | 34                | 3.6  |                |
| American Indian                                                   | 4        | 0.2  | 5          | 0.2  | 7               | 0.5  | 5                 | 0.5  |                |
| Asian/Pacific Islander                                            | 75       | 3.0  | 59         | 2.2  | 20              | 1.3  | 7                 | 0.8  |                |
| Unknown                                                           | 19       | 0.8  | 30         | 1.1  | 19              | 1.2  | 9                 | 1.0  |                |
| Education                                                         |          |      |            |      |                 |      |                   |      | <0.001         |
| ≤ High school/GED or less                                         | 356      | 14.2 | 483        | 18.3 | 341             | 22.5 | 216               | 23.4 |                |
| School after high school                                          | 784      | 31.4 | 998        | 37.8 | 627             | 41.3 | 412               | 44.5 |                |
| College degree or higher                                          | 1359     | 54.4 | 1159       | 43.9 | 550             | 36.2 | 297               | 32.1 |                |
| Hysterectomy at randomization                                     | 820      | 32.6 | 979        | 36.9 | 616             | 40.4 | 410               | 44.0 | <0.001         |
| Number of term pregnancies                                        |          |      |            |      |                 |      |                   |      | <0.001         |
| Never been pregnant/ No term pregnancy                            | 363      | 14.6 | 377        | 14.3 | 178             | 11.8 | 118               | 12.7 |                |
| 1                                                                 | 219      | 8.8  | 217        | 8.2  | 154             | 10.2 | 71                | 7.7  |                |
| 2                                                                 | 750      | 30.1 | 676        | 25.6 | 338             | 22.3 | 198               | 21.3 |                |
| 3                                                                 | 634      | 25.5 | 626        | 23.7 | 358             | 23.7 | 210               | 22.6 |                |
| 4+                                                                | 525      | 21.1 | 749        | 28.3 | 485             | 32.1 | 331               | 35.7 |                |
| Age at first birth                                                |          |      |            |      |                 |      |                   |      | <0.001         |
| Never pregnant/No term pregnancy                                  | 363      | 15.5 | 377        | 15.5 | 178             | 12.9 | 118               | 14.0 |                |
| <20                                                               | 193      | 8.2  | 251        | 10.3 | 210             | 15.2 | 177               | 21.0 |                |
| 20 – 29                                                           | 1551     | 66.1 | 1569       | 64.7 | 863             | 62.4 | 466               | 55.3 |                |
| 30+                                                               | 240      | 10.2 | 229        | 9.4  | 133             | 9.6  | 81                | 9.6  |                |
| Family history of female relative with breast cancer              | 560      | 23.3 | 628        | 24.7 | 349             | 24.3 | 199               | 22.6 | 0.59           |
| Bilateral oophorectomy                                            | 398      | 16.0 | 429        | 16.5 | 281             | 18.8 | 192               | 21.1 | 0.66           |
| Treated diabetes (pills or shots)                                 | 34       | 1.4  | 69         | 2.6  | 85              | 5.6  | 92                | 9.9  | <0.001         |
| Smoking status                                                    |          |      |            |      |                 |      |                   |      | <0.001         |
| Never                                                             | 1190     | 48.0 | 1247       | 47.5 | 762             | 50.6 | 476               | 51.3 |                |
| Past                                                              | 1098     | 44.3 | 1206       | 45.9 | 670             | 44.5 | 401               | 43.3 |                |
| Current                                                           | 193      | 7.8  | 172        | 6.6  | 73              | 4.9  | 50                | 5.4  |                |
| Self-reported health                                              |          |      |            |      |                 |      |                   |      | <0.001         |
| Excellent                                                         | 709      | 28.4 | 457        | 17.3 | 173             | 11.4 | 53                | 5.7  |                |
| Very good                                                         | 1139     | 45.6 | 1238       | 46.9 | 614             | 40.4 | 294               | 31.6 |                |
| Good                                                              | 559      | 22.4 | 784        | 29.7 | 583             | 38.4 | 418               | 44.9 |                |
| Fair/poor                                                         | 90       | 3.6  | 161        | 6.1  | 149             | 9.8  | 165               | 17.7 |                |
| Duration of unopposed estrogen use                                |          |      |            |      |                 |      |                   |      | <0.001         |
| None                                                              | 1612     | 64.1 | 1724       | 64.9 | 1040            | 68.2 | 652               | 70.0 |                |
| Past User                                                         | 300      | 11.9 | 312        | 11.7 | 178             | 11.7 | 112               | 12.0 |                |
| Current User                                                      | 603      | 24.0 | 622        | 23.4 | 307             | 20.1 | 168               | 18.0 |                |
| < 5 Years ( <i>Duration; corresponds to past or current use</i> ) | 311      | 12.4 | 293        | 11.0 | 186             | 12.2 | 132               | 14.2 | <0.001         |
| 5 - <10 Years                                                     | 182      | 7.2  | 179        | 6.7  | 85              | 5.6  | 49                | 5.3  |                |
| 10+ Years                                                         | 420      | 16.7 | 462        | 17.4 | 215             | 14.1 | 99                | 10.6 |                |
| Duration of estrogen + progesterone use                           |          |      |            |      |                 |      |                   |      | <0.001         |
| None                                                              | 1455     | 57.8 | 1775       | 66.9 | 1140            | 74.7 | 725               | 77.8 |                |
| Past User                                                         | 214      | 8.5  | 249        | 9.4  | 123             | 8.1  | 71                | 7.6  |                |
| Current User                                                      | 847      | 33.7 | 631        | 23.8 | 263             | 17.2 | 136               | 14.6 |                |
| < 5 Years ( <i>Duration; corresponds to past or current use</i> ) | 443      | 17.6 | 363        | 13.7 | 193             | 12.6 | 110               | 11.8 | <0.001         |
| 5 - <10 Years                                                     | 303      | 12.0 | 270        | 10.2 | 104             | 6.8  | 59                | 6.3  |                |
| 10+ Years                                                         | 316      | 12.6 | 250        | 9.4  | 89              | 5.8  | 38                | 4.1  |                |
| CT participant                                                    | 823      | 32.7 | 1184       | 44.5 | 829             | 54.3 | 552               | 59.2 | <0.001         |
| HT randomization group                                            |          |      |            |      |                 |      |                   |      | 0.85           |
| CEE active                                                        | 30       | 1.2  | 44         | 1.7  | 54              | 3.5  | 46                | 4.9  |                |
| CEE placebo                                                       | 32       | 1.3  | 71         | 2.7  | 59              | 3.9  | 58                | 6.2  |                |

<sup>1</sup> P-value is adjusted for age, race/ethnicity, education, and hysterectomy.

Cespedes Feliciano, et al. Methodological Considerations for Disentangling a Risk Factor's Influence on Cancer Incidence versus Post-Diagnosis Survival

|                                                              |             |             |             |             |             |             |             |             |        |
|--------------------------------------------------------------|-------------|-------------|-------------|-------------|-------------|-------------|-------------|-------------|--------|
| CEE + MPA active                                             | 96          | 3.8         | 162         | 6.1         | 110         | 7.2         | 68          | 7.3         |        |
| CEE + MPA placebo                                            | 80          | 3.2         | 107         | 4.0         | 82          | 5.4         | 58          | 6.2         |        |
| DM randomization group                                       |             |             |             |             |             |             |             |             | 0.74   |
| Intervention                                                 | 239         | 9.5         | 369         | 13.9        | 243         | 15.9        | 158         | 17.0        |        |
| Comparison group                                             | 387         | 15.4        | 551         | 20.7        | 395         | 25.9        | 255         | 27.4        |        |
|                                                              | <b>Mean</b> | <b>(SD)</b> | <b>Mean</b> | <b>(SD)</b> | <b>Mean</b> | <b>(SD)</b> | <b>Mean</b> | <b>(SD)</b> |        |
| Total energy expenditure/wk from physical activity (MET-hrs) | 15.4        | 14.0        | 12.5        | 12.7        | 9.8         | 11.6        | 7.0         | 10.3        | <0.001 |
| RAND36 Physical functioning (0 -100 best)                    | 88.1        | 14.3        | 83.9        | 17.0        | 77.5        | 20.4        | 67.8        | 23.4        | <0.001 |
| Height (cm)                                                  | 163.3       | 6.3         | 162.4       | 6.2         | 161.8       | 6.2         | 161.1       | 6.7         | <0.001 |
| Weight (kg)                                                  | 60.5        | 6.1         | 72.1        | 6.7         | 84.4        | 7.3         | 100.8       | 11.3        | <0.001 |
| Waist circumference (cm)                                     | 75.3        | 6.9         | 85.8        | 7.5         | 96.4        | 8.2         | 108.1       | 10.0        | <0.001 |
| Hip circumference (cm)                                       | 97.3        | 6.1         | 105.6       | 6.2         | 114.2       | 7.0         | 126.8       | 10.1        | <0.001 |
| Gail 5-year risk of breast cancer                            | 2.0         | 1.1         | 2.0         | 1.2         | 2.0         | 1.2         | 1.8         | 1.2         | 0.58   |
| Time to invasive breast cancer (years)                       | 6.3         | 4.0         | 6.5         | 4.0         | 6.4         | 3.9         | 6.4         | 3.8         | 0.27   |

**eTable2. Baseline Characteristics of Colorectal Cancer Survivor Cohort by baseline BMI group (n=2290)**

|                                                                   | Normal  |      | Overweight |      | Grade-1 Obesity |      | Grade-2+3 Obesity |      | P <sup>2</sup> |
|-------------------------------------------------------------------|---------|------|------------|------|-----------------|------|-------------------|------|----------------|
|                                                                   | < 25    |      | 25 - < 30  |      | 30 - < 35       |      | ≥ 35              |      |                |
|                                                                   | (n=705) |      | (n=808)    |      | (n=478)         |      | (n=299)           |      |                |
|                                                                   | N       | %    | N          | %    | N               | %    | N                 | %    |                |
| Age at screening                                                  |         |      |            |      |                 |      |                   |      | 0.001          |
| 50-59                                                             | 140     | 19.9 | 130        | 16.1 | 105             | 22.0 | 76                | 25.4 |                |
| 60-69                                                             | 315     | 44.7 | 384        | 47.5 | 229             | 47.9 | 161               | 53.8 |                |
| 70-79                                                             | 250     | 35.5 | 294        | 36.4 | 144             | 30.1 | 62                | 20.7 |                |
| Race/ethnicity                                                    |         |      |            |      |                 |      |                   |      | <0.001         |
| White                                                             | 630     | 89.4 | 679        | 84.0 | 391             | 81.8 | 226               | 75.6 |                |
| Black                                                             | 26      | 3.7  | 71         | 8.8  | 63              | 13.2 | 60                | 20.1 |                |
| Hispanic                                                          | 13      | 1.8  | 23         | 2.8  | 13              | 2.7  | 6                 | 2.0  |                |
| American Indian                                                   | 1       | 0.1  | 5          | 0.6  | 3               | 0.6  | 0                 | 0.0  |                |
| Asian/Pacific Islander                                            | 23      | 3.3  | 17         | 2.1  | 5               | 1.0  | 4                 | 1.3  |                |
| Unknown                                                           | 12      | 1.7  | 13         | 1.6  | 3               | 0.6  | 3                 | 1.0  |                |
| Education                                                         |         |      |            |      |                 |      |                   |      | <0.001         |
| ≤ High school/GED or less                                         | 139     | 19.9 | 184        | 22.9 | 130             | 27.3 | 76                | 25.6 |                |
| School after high school                                          | 270     | 38.6 | 330        | 41.1 | 185             | 38.8 | 125               | 42.1 |                |
| College degree or higher                                          | 290     | 41.5 | 289        | 36.0 | 162             | 34.0 | 96                | 32.3 |                |
| Hysterectomy at randomization                                     | 275     | 39.0 | 341        | 42.2 | 203             | 42.5 | 130               | 43.5 | 0.31           |
| Number of term pregnancies                                        |         |      |            |      |                 |      |                   |      | 0.002          |
| Never been pregnant/ No term pregnancy                            | 103     | 14.7 | 94         | 11.7 | 49              | 10.4 | 27                | 9.1  |                |
| 1                                                                 | 64      | 9.2  | 60         | 7.5  | 40              | 8.5  | 21                | 7.0  |                |
| 2                                                                 | 173     | 24.7 | 175        | 21.8 | 96              | 20.3 | 60                | 20.1 |                |
| 3                                                                 | 167     | 23.9 | 190        | 23.6 | 119             | 25.2 | 80                | 26.8 |                |
| 4+                                                                | 192     | 27.5 | 285        | 35.4 | 168             | 35.6 | 110               | 36.9 |                |
| Age at first birth                                                |         |      |            |      |                 |      |                   |      | 0.01           |
| Never pregnant/No term pregnancy                                  | 103     | 16.2 | 94         | 12.8 | 49              | 11.1 | 27                | 10.0 |                |
| <20                                                               | 57      | 8.9  | 102        | 13.9 | 76              | 17.2 | 50                | 18.5 |                |
| 20 – 29                                                           | 420     | 65.9 | 477        | 65.1 | 282             | 63.8 | 171               | 63.3 |                |
| 30+                                                               | 57      | 8.9  | 60         | 8.2  | 35              | 7.9  | 22                | 8.1  |                |
| Family history of female relative with breast cancer              | 135     | 20.2 | 133        | 17.3 | 74              | 16.8 | 57                | 20.1 | 0.57           |
| Bilateral oophorectomy                                            | 126     | 18.3 | 149        | 18.9 | 98              | 21.3 | 64                | 22.1 | 0.28           |
| Treated diabetes (pills or shots)                                 | 14      | 2.0  | 42         | 5.2  | 35              | 7.3  | 51                | 17.1 | <0.001         |
| Smoking status                                                    |         |      |            |      |                 |      |                   |      | 0.003          |
| Never                                                             | 336     | 48.6 | 384        | 48.2 | 248             | 52.7 | 148               | 49.8 |                |
| Past                                                              | 290     | 41.9 | 347        | 43.6 | 202             | 42.9 | 129               | 43.4 |                |
| Current                                                           | 66      | 9.5  | 65         | 8.2  | 21              | 4.5  | 20                | 6.7  |                |
| Self-reported health                                              |         |      |            |      |                 |      |                   |      | <0.001         |
| Excellent                                                         | 163     | 23.3 | 114        | 14.1 | 51              | 10.7 | 17                | 5.7  |                |
| Very good                                                         | 303     | 43.3 | 362        | 44.9 | 186             | 39.1 | 86                | 28.9 |                |
| Good                                                              | 190     | 27.1 | 272        | 33.7 | 189             | 39.7 | 140               | 47.0 |                |
| Fair/poor                                                         | 44      | 6.3  | 58         | 7.2  | 50              | 10.5 | 55                | 18.5 |                |
| Duration of unopposed estrogen use                                |         |      |            |      |                 |      |                   |      | <0.001         |
| None                                                              | 464     | 65.9 | 501        | 62.0 | 339             | 70.9 | 227               | 75.9 |                |
| Past User                                                         | 105     | 14.9 | 153        | 18.9 | 61              | 12.8 | 40                | 13.4 |                |
| Current User                                                      | 135     | 19.2 | 154        | 19.1 | 78              | 16.3 | 32                | 10.7 |                |
| < 5 Years ( <i>Duration; corresponds to past or current use</i> ) | 99      | 14.0 | 122        | 15.1 | 63              | 13.2 | 44                | 14.7 | <0.001         |
| 5 - <10 Years                                                     | 50      | 7.1  | 57         | 7.1  | 23              | 4.8  | 11                | 3.7  |                |
| 10+ Years                                                         | 92      | 13.0 | 128        | 15.8 | 54              | 11.3 | 17                | 5.7  |                |
| Duration of estrogen + progesterone use                           |         |      |            |      |                 |      |                   |      | <0.001         |
| None                                                              | 536     | 76.2 | 641        | 79.3 | 392             | 82.2 | 266               | 89.0 |                |
| Past User                                                         | 54      | 7.7  | 61         | 7.5  | 35              | 7.3  | 16                | 5.4  |                |
| Current User                                                      | 113     | 16.1 | 106        | 13.1 | 50              | 10.5 | 17                | 5.7  |                |
| < 5 Years ( <i>Duration; corresponds to past or current use</i> ) | 80      | 11.3 | 89         | 11.0 | 41              | 8.6  | 20                | 6.7  | <0.001         |
| 5 - <10 Years                                                     | 38      | 5.4  | 41         | 5.1  | 26              | 5.4  | 6                 | 2.0  |                |
| 10+ Years                                                         | 51      | 7.2  | 37         | 4.6  | 19              | 4.0  | 7                 | 2.3  |                |
| CT participant                                                    | 285     | 40.4 | 395        | 48.9 | 256             | 53.6 | 163               | 54.5 | <0.001         |
| HT randomization group                                            |         |      |            |      |                 |      |                   |      | 0.80           |
| CEE active                                                        | 27      | 3.8  | 33         | 4.1  | 20              | 4.2  | 21                | 7.0  |                |
| CEE placebo                                                       | 17      | 2.4  | 32         | 4.0  | 21              | 4.4  | 18                | 6.0  |                |

<sup>2</sup> P-value is adjusted for age, race/ethnicity, education, and hysterectomy.

Cespedes Feliciano, et al. Methodological Considerations for Disentangling a Risk Factor's Influence on Cancer Incidence versus Post-Diagnosis Survival

|                                                              |             |             |             |             |             |             |             |             |        |
|--------------------------------------------------------------|-------------|-------------|-------------|-------------|-------------|-------------|-------------|-------------|--------|
| CEE + MPA active                                             | 37          | 5.2         | 48          | 5.9         | 32          | 6.7         | 13          | 4.3         |        |
| CEE + MPA placebo                                            | 47          | 6.7         | 53          | 6.6         | 24          | 5.0         | 27          | 9.0         |        |
| DM randomization group                                       |             |             |             |             |             |             |             |             | 0.71   |
| Intervention                                                 | 70          | 9.9         | 127         | 15.7        | 75          | 15.7        | 45          | 15.1        |        |
| Comparison group                                             | 111         | 15.7        | 158         | 19.6        | 121         | 25.3        | 71          | 23.7        |        |
|                                                              | <b>Mean</b> | <b>(SD)</b> | <b>Mean</b> | <b>(SD)</b> | <b>Mean</b> | <b>(SD)</b> | <b>Mean</b> | <b>(SD)</b> |        |
| Total energy expenditure/wk from physical activity (MET-hrs) | 14.0        | 14.2        | 11.5        | 11.9        | 10.0        | 12.2        | 6.4         | 9.8         | <0.001 |
| RAND36 Physical functioning (0 -100 best)                    | 85.8        | 16.3        | 81.2        | 18.3        | 75.4        | 21.4        | 69.1        | 22.6        | <0.001 |
| Height (cm)                                                  | 162.7       | 6.2         | 161.7       | 6.0         | 161.8       | 6.3         | 161.2       | 6.5         | <0.001 |
| Weight (kg)                                                  | 60.4        | 6.1         | 71.8        | 6.7         | 84.6        | 7.3         | 101.5       | 11.5        | <0.001 |
| Waist circumference (cm)                                     | 76.8        | 8.3         | 87.0        | 7.3         | 97.9        | 7.7         | 109.4       | 10.7        | <0.001 |
| Hip circumference (cm)                                       | 97.0        | 5.5         | 105.4       | 6.3         | 114.3       | 6.8         | 127.3       | 9.9         | <0.001 |
| Gail 5-year risk of breast cancer                            | 1.9         | 1.1         | 1.9         | 1.1         | 1.8         | 1.0         | 1.7         | 1.1         | 0.91   |
| Time to colorectal cancer (years)                            | 6.6         | 4.0         | 6.4         | 3.9         | 6.5         | 3.9         | 6.4         | 3.9         | 0.79   |

**eTable3. Breast Cancer Incidence and Death after Breast Cancer in the Women's Health Initiative: Multivariable-Adjusted<sup>3</sup> Hazard Ratios by BMI at Enrollment compared to women of normal weight (BMI < 25)**

|                                                                                                                           | Normal < 25 |        | Overweight 25 - <30 |        |      |             | Grade-1 Obesity 30 - <35 |        |      |             | Grade-2+3 Obesity ≥ 35 |        |      |             | P-value <sup>4</sup> |
|---------------------------------------------------------------------------------------------------------------------------|-------------|--------|---------------------|--------|------|-------------|--------------------------|--------|------|-------------|------------------------|--------|------|-------------|----------------------|
|                                                                                                                           | N           | %      | N                   | %      | HR   | CI          | N                        | %      | HR   | CI          | N                      | %      | HR   | CI          |                      |
| <b>A. Events for the Full cohort;<br/>Time from enrollment to:</b>                                                        |             |        |                     |        |      |             |                          |        |      |             |                        |        |      |             |                      |
| Invasive Breast Cancer(T1)                                                                                                | 2517        | (0.41) | 2658                | (0.43) | 1.12 | (1.06,1.18) | 1526                     | (0.47) | 1.31 | (1.23,1.40) | 932                    | (0.50) | 1.48 | (1.36,1.61) | <0.001               |
| Deaths due to Breast Cancer (T3a)                                                                                         | 194         | (0.03) | 226                 | (0.03) | 1.11 | (0.91,1.36) | 137                      | (0.04) | 1.19 | (0.94,1.52) | 124                    | (0.06) | 1.99 | (1.54,2.56) | <0.001               |
| Deaths due to any cause after Breast Cancer (T3b)                                                                         | 409         | (0.06) | 450                 | (0.06) | 1.09 | (0.95,1.26) | 296                      | (0.08) | 1.36 | (1.16,1.60) | 214                    | (0.10) | 1.89 | (1.57,2.28) | <0.001               |
| <b>B. Events for the Survivor cohort;<br/>Time from diagnosis of invasive breast cancer (post-diagnosis survival) to:</b> |             |        |                     |        |      |             |                          |        |      |             |                        |        |      |             |                      |
| Deaths due to Breast Cancer (T2a) <sup>5</sup>                                                                            | 175         | (0.98) | 204                 | (1.13) | 1.05 | (0.84,1.30) | 125                      | (1.20) | 0.95 | (0.73,1.23) | 106                    | (1.73) | 1.25 | (0.94,1.67) | 0.33                 |
| Deaths due to any cause (T2b)                                                                                             | 409         | (2.29) | 450                 | (2.49) | 0.99 | (0.85,1.15) | 296                      | (2.85) | 0.99 | (0.83,1.19) | 214                    | (3.49) | 1.25 | (1.02,1.53) | 0.10                 |

<sup>3</sup> Covariate adjustments described in Figure 2 legend.

<sup>4</sup> Corresponds to a 1 degree-of-freedom test for trend of the association between BMI group and invasive breast cancer, death or survival.

<sup>5</sup> The difference in the number of events for deaths due to breast cancer after enrollment (i.e., 194, 226, 137 and 124) and deaths due to breast cancer after diagnosis (i.e., 175, 204, 125 and 106) is due to the participants that did not consent to extended follow-up but death information was available through passive follow-up sources. For these participants, time to death after enrollment is known, but time to incident invasive breast cancer was not available.



**eTable 4. Colorectal Cancer Incidence and Death after Colorectal Cancer in the Women's Health Initiative: Multivariable-Adjusted<sup>6</sup> Hazard Ratios by BMI at Enrollment compared to women of normal weight (BMI < 25)**

|                                                                               | Normal < 25 |        | Overweight 25 - <30 |        |      |              | Grade-1 Obesity 30 - <35 |        |      |              | Grade-2+3 Obesity ≥ 35 |        |      |              | P-Value <sup>7</sup> |
|-------------------------------------------------------------------------------|-------------|--------|---------------------|--------|------|--------------|--------------------------|--------|------|--------------|------------------------|--------|------|--------------|----------------------|
|                                                                               | N           | %      | N                   | %      | HR   | CI           | N                        | %      | HR   | CI           | N                      | %      | HR   | CI           |                      |
| <b>A. Events for the Full cohort;</b>                                         |             |        |                     |        |      |              |                          |        |      |              |                        |        |      |              |                      |
| <b>Time from enrollment to:</b>                                               |             |        |                     |        |      |              |                          |        |      |              |                        |        |      |              |                      |
| <b>enrollment (cancer incidence and cancer mortality)</b>                     |             |        |                     |        |      |              |                          |        |      |              |                        |        |      |              |                      |
| Colorectal Cancer (T1)                                                        | 705         | (0.11) | 808                 | (0.13) | 1.10 | (0.98, 1.23) | 478                      | (0.14) | 1.11 | (0.96, 1.27) | 299                    | (0.16) | 1.20 | (1.02, 1.42) | 0.03                 |
| Deaths due to Colorectal Cancer (T3a)                                         | 202         | (0.03) | 238                 | (0.03) | 1.18 | (0.96, 1.46) | 143                      | (0.04) | 1.13 | (0.87, 1.46) | 100                    | (0.05) | 1.40 | (1.04, 1.88) | 0.05                 |
| Deaths due to any cause after Colorectal Cancer (T3b)                         | 245         | (0.04) | 306                 | (0.04) | 1.17 | (0.97, 1.42) | 183                      | (0.05) | 1.21 | (0.96, 1.52) | 120                    | (0.05) | 1.41 | (1.08, 1.85) | 0.01                 |
| <b>B. Events for the Survivor cohort;</b>                                     |             |        |                     |        |      |              |                          |        |      |              |                        |        |      |              |                      |
| <b>Time from diagnosis of colorectal cancer (post-diagnosis survival) to:</b> |             |        |                     |        |      |              |                          |        |      |              |                        |        |      |              |                      |
| Deaths due to Colorectal Cancer (T2a) <sup>8</sup>                            | 182         | (4.82) | 212                 | (4.84) | 1.09 | (0.87, 1.38) | 128                      | (4.95) | 1.06 | (0.79, 1.41) | 82                     | (5.00) | 1.18 | (0.84, 1.66) | 0.39                 |
| Deaths due to any cause (T2b)                                                 | 245         | (6.49) | 306                 | (6.99) | 1.15 | (0.94, 1.41) | 183                      | (7.08) | 1.15 | (0.90, 1.47) | 120                    | (7.32) | 1.27 | (0.95, 1.69) | 0.11                 |

<sup>6</sup> Covariate adjustments described in Figure 3 legend.

<sup>7</sup> Corresponds to a 1 degree-of-freedom test for trend of the association between BMI group and colorectal cancer, death or survival.

<sup>8</sup> The difference in the number of events for deaths due to colorectal cancer (i.e., 202, 238, 143 and 100) and survival from colorectal cancer (i.e., 182, 212, 128 and 82) is due to the participants that did not consent to extended follow-up but death information was available through passive follow-up sources. For these participants, time from enrollment to death is known, but time to incident colorectal cancer was not available.

eFigure 1.

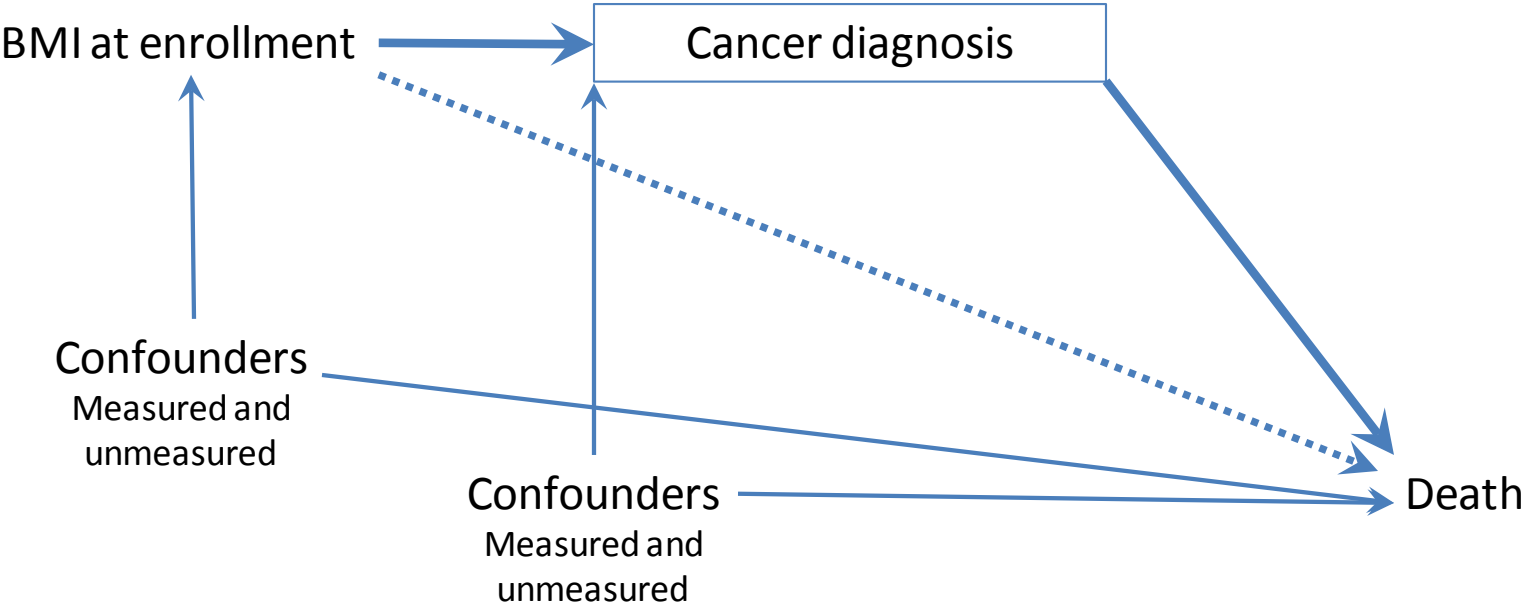



eFigure 3.

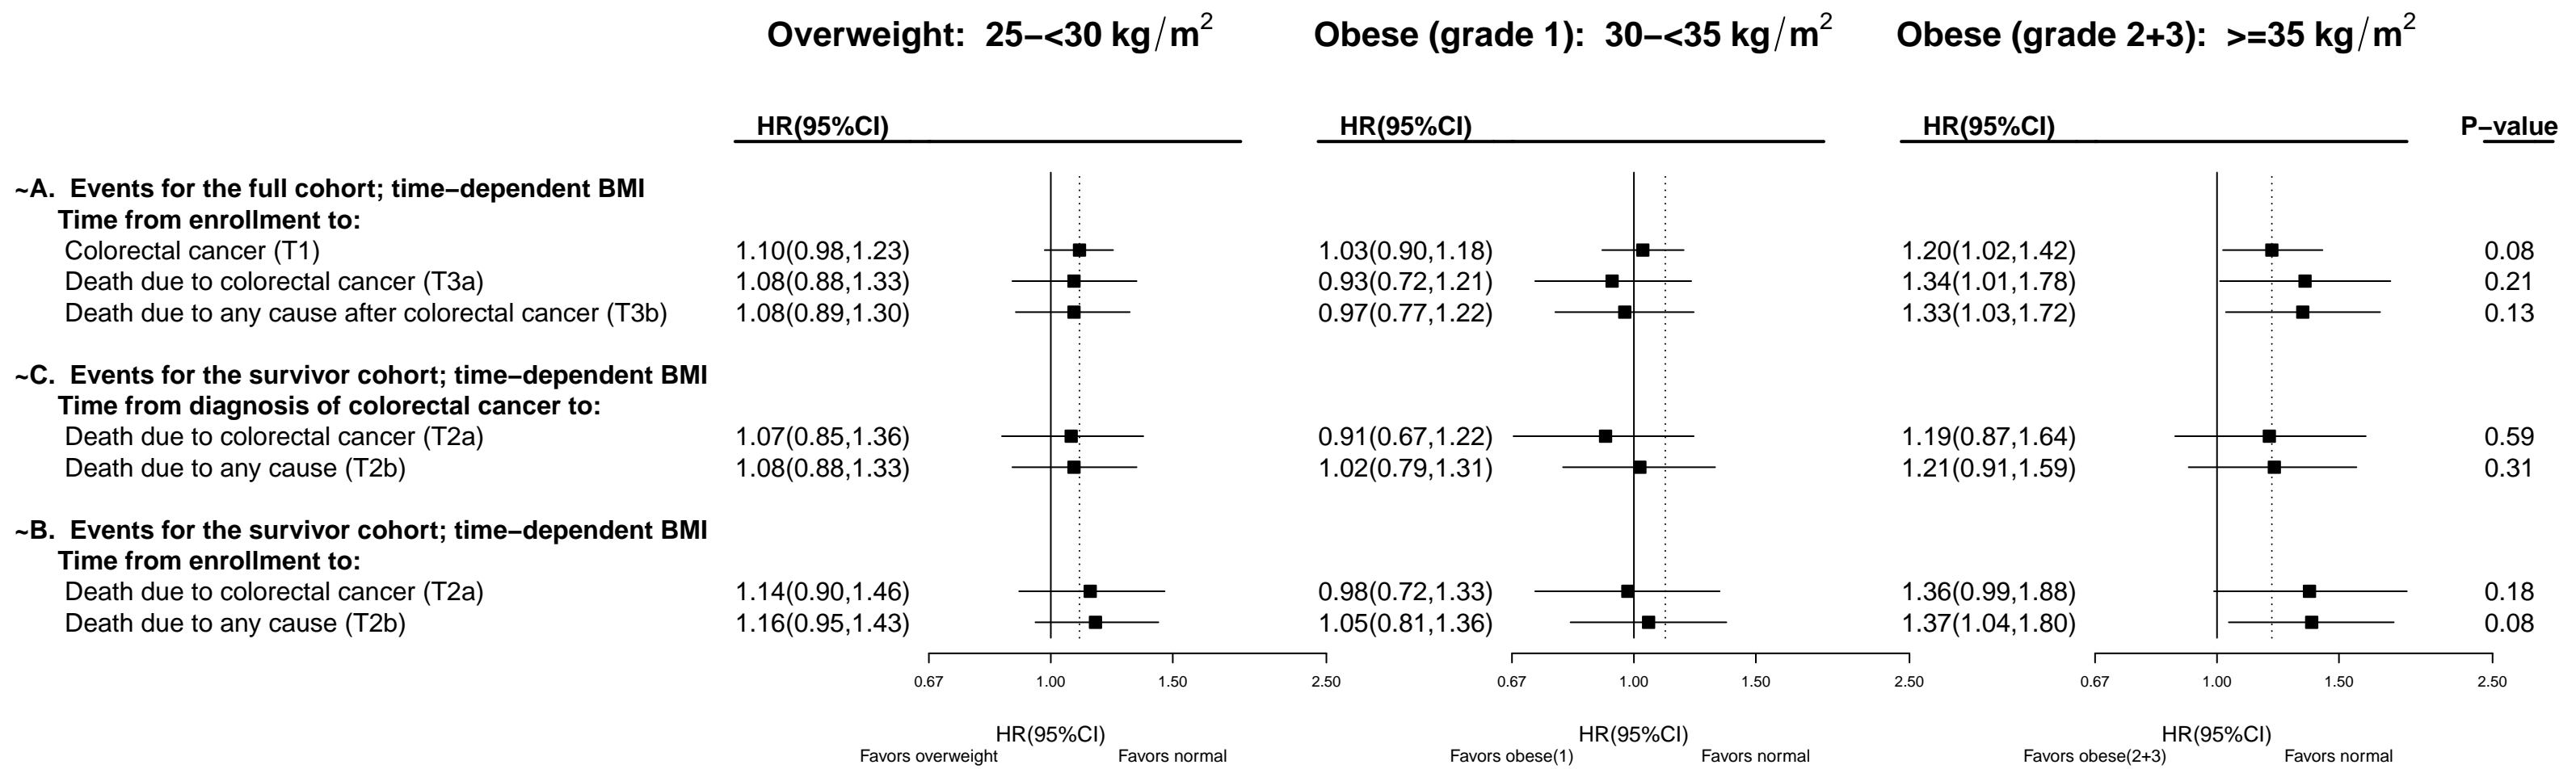

Supplement: NIHMS929837-supplement-Supp_info.pdf [file NIHMS929837-supplement-Supp_info.pdf]
